# Supplementary material for: Association of maternal vitamin D status with the risk of preeclampsia
Source: Royal Society of Chemistry journal article supplement (doi:10.1039/d3fo00007a), 2023-01-01
Supplement: d3fo00007a1.pdf [file d3fo00007a1.pdf]

**Supplementary Table. 1 Maternal and neonatal characteristics of study groups**

| <b>Maternal characteristics</b><br>(Mean ± SD) | <b>PE</b><br>(n=108) | <b>Non-PE</b><br>(n=216) | <b>p</b> |
|------------------------------------------------|----------------------|--------------------------|----------|
| <b>V1 (11-14 weeks)</b>                        |                      |                          |          |
| Weight (kg)                                    | 67.7 ± 14.0          | 58.7 ± 10.6              | 0.001    |
| BMI (kg/m <sup>2</sup> )                       | 28.0 ± 5.4           | 24.1 ± 4.1               | 0.001    |
| Systolic blood pressure (mmHg)                 | 116.5 ± 11.4         | 108.6 ± 8.4              | 0.001    |
| Diastolic blood pressure (mmHg)                | 75.2 ± 8.4           | 70.3 ± 6.6               | 0.001    |
| <b>V2 (18-22 weeks)</b>                        |                      |                          |          |
| BMI (kg/m <sup>2</sup> )                       | 28.9 ± 5.3           | 24.9 ± 4.1               | 0.001    |
| Systolic blood pressure (mmHg)                 | 117.3 ± 10.2         | 108.3 ± 9.4              | 0.001    |
| Diastolic blood pressure (mmHg)                | 75.7 ± 8.0           | 69.7 ± 6.4               | 0.001    |
| <b>V3 (26-28 weeks)</b>                        |                      |                          |          |
| BMI (kg/m <sup>2</sup> )                       | 30.9 ± 5.4           | 26.7 ± 4.2               | 0.001    |
| Systolic blood pressure (mmHg)                 | 120.1 ± 13.4         | 109.7 ± 10.1             | 0.001    |
| Diastolic blood pressure (mmHg)                | 78.1 ± 9.3           | 70.9 ± 6.9               | 0.001    |
| <b>V4 (At delivery)</b>                        |                      |                          |          |
| BMI (kg/m <sup>2</sup> )                       | 32.6 ± 5.4           | 28.3 ± 4.2               | 0.001    |
| Gestational age (wks)                          | 37.6 ± 2.5           | 38.5 ± 1.3               | 0.001    |
| Systolic blood pressure (mmHg)                 | 139.7 ± 16.4         | 119.4 ± 11.3             | 0.001    |
| Diastolic blood pressure (mmHg)                | 87.8 ± 12.1          | 75.5 ± 7.9               | 0.001    |
| <b>Neonatal characteristics (Mean ± SD)</b>    |                      |                          |          |
| Weight (gm)                                    | 2698.4 ± 627.2       | 2864.5 ± 422.4           | 0.005    |
| Length (cm)                                    | 47.8 ± 4.5           | 48.4 ± 3.5               | 0.19     |

BMI: Body mass index, PE: Preeclampsia, p: Level of significance, n: Number of subjects; for baby length the sample size was lower in the PE group by 15 and 10 in the Non-PE group
